# Supplementary material
Source: publisher figshare collection journal article supplement (https://acs.figshare.com/ndownloader/files/4184950)
Supplement: Supplementary file 1 [file 4184950]

## Supporting Information

# Electrical Conductivities, Viscosities, and Densities of *N*-methoxymethyl- and *N*-butyl-*N*-methylpyrrolidinium Ionic Liquids with bis(fluorosulfonyl)amide anion

*Takashi Makino,<sup>†</sup> Mitsuhiro Kanakubo,<sup>†\*</sup> Tatsuya Umecky,<sup>†</sup> Akira Suzuki,<sup>†</sup> Tetsuo Nishida,<sup>‡</sup> and Jun  
Takano<sup>‡</sup>*

National Institute of Advanced Industrial Science and Technology (AIST), 4-2-1 Nigatake, Miyagino-  
ku, Sendai 983-8551, Japan, and Research and Development Department, Stella Chemifa Corporation,  
1-41 Rinkai-cho, Izumiotsu, Osaka 595-0075, Japan

---

<sup>†</sup> National Institute of Advanced Industrial Science and Technology

<sup>\*</sup> Corresponding author. e-mail: m-kanakubo@aist.go.jp, fax: +81-22-232-7002.

<sup>‡</sup> Stella Chemifa Co., Ltd.

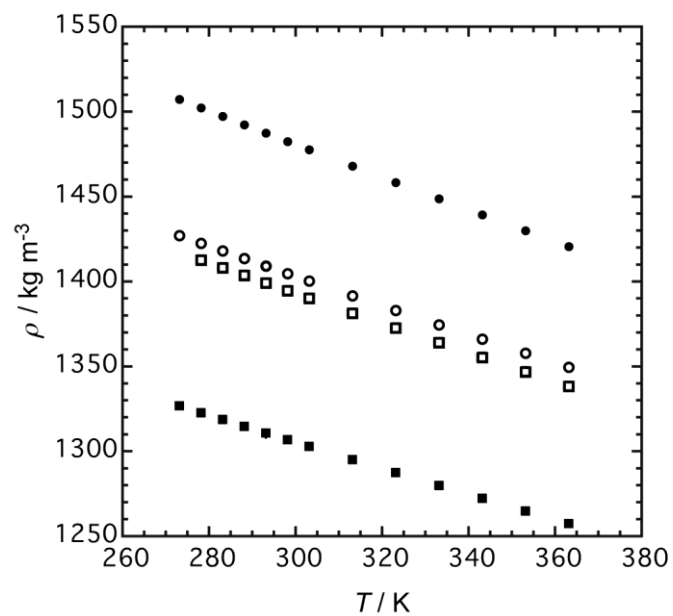

**Figure S1.** Temperature  $T$  dependencies of the experimental density  $\rho_{\text{exp}}$ . Circle (open), [Pyr<sub>1,101</sub>][FSA]; square (open), [Pyr<sub>1,4</sub>][FSA]; diamond (filled), [Pyr<sub>1,4</sub>][FSA] (ref. 4); circle (filled), [Pyr<sub>1,101</sub>][NTf<sub>2</sub>] (ref. 15); square (filled), [Pyr<sub>1,4</sub>][NTf<sub>2</sub>] (ref. 16). The data point of [Pyr<sub>1,4</sub>][FSA] in ref. 4 is behind that of the present study.

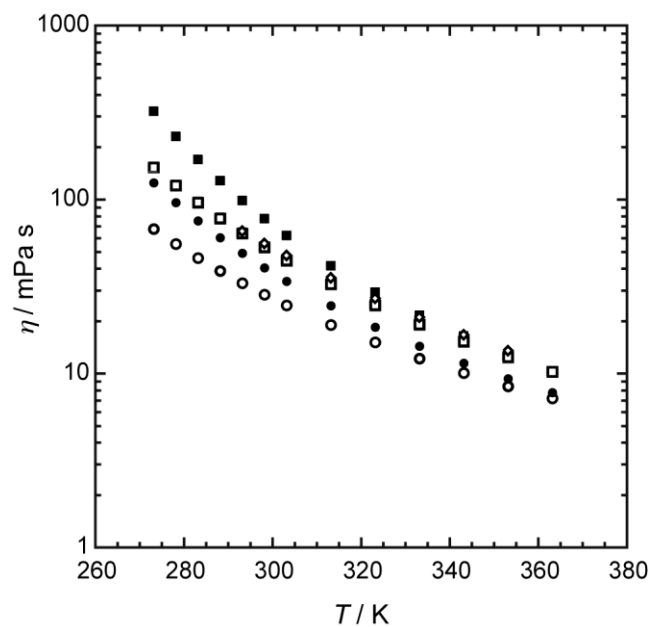

**Figure S2.** Temperature  $T$  dependencies of the experimental viscosity  $\eta_{\text{exp}}$ . Circle (open),  $[\text{Pyr}_{1,101}][\text{FSA}]$ ; square (open),  $[\text{Pyr}_{1,4}][\text{FSA}]$ ; diamond (open),  $[\text{Pyr}_{1,4}][\text{FSA}]$  (ref. 2); diamond (filled),  $[\text{Pyr}_{1,4}][\text{FSA}]$  (ref. 4); circle (filled),  $[\text{Pyr}_{1,101}][\text{NTf}_2]$  (ref. 15); square (filled),  $[\text{Pyr}_{1,4}][\text{NTf}_2]$  (ref. 16). The data point of  $[\text{Pyr}_{1,4}][\text{FSA}]$  in ref. 4 is behind those of the present study and ref. 2.

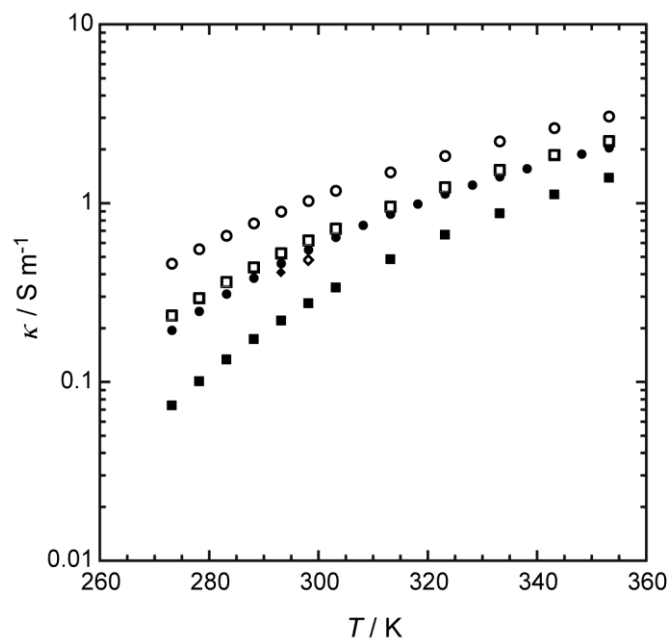

**Figure S3.** Temperature  $T$  dependencies of the experimental electrical conductivity  $\kappa_{\text{exp}}$ . Circle (open), [Pyr<sub>1,10</sub>][FSA]; square (open), [Pyr<sub>1,4</sub>][FSA]; diamond (open), [Pyr<sub>1,4</sub>][FSA] (ref. 2); diamond (filled), [Pyr<sub>1,4</sub>][FSA] (ref. 4); circle (filled), [Pyr<sub>1,10</sub>][NTf<sub>2</sub>] (ref. 15); square (filled), [Pyr<sub>1,4</sub>][NTf<sub>2</sub>] (ref. 16).

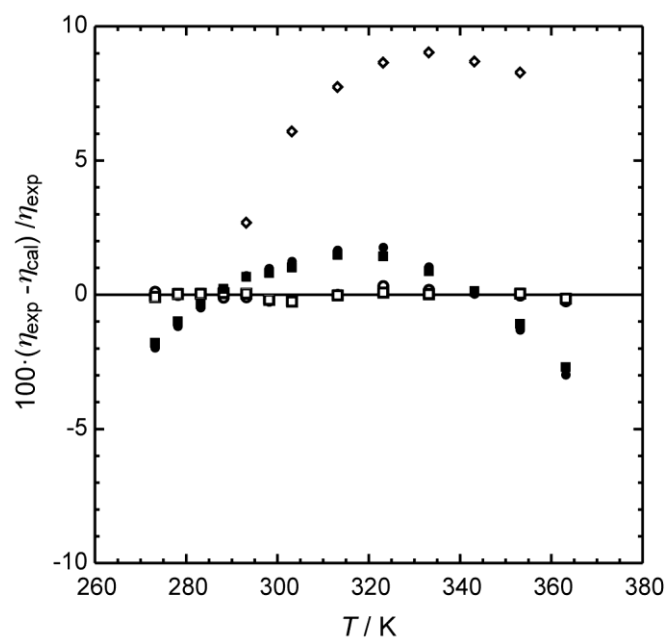

**Figure S4.** Overview of the residuals between the experimental viscosity  $\eta_{\text{exp}}$  and the calculated viscosity  $\eta_{\text{cal}}$  as a function of temperature  $T$ . Circle (open), [Pyr<sub>1,10</sub>][FSA] for VFT; circle (filled), [Pyr<sub>1,10</sub>][FSA] for Litovitz; square (open), [Pyr<sub>1,4</sub>][FSA] for VFT; square (filled), [Pyr<sub>1,4</sub>][FSA] for Litovitz; diamond (filled), [Pyr<sub>1,4</sub>][FSA] (ref. 4) for VFT; diamond (open), [Pyr<sub>1,4</sub>][FSA] (ref. 2) for VFT.

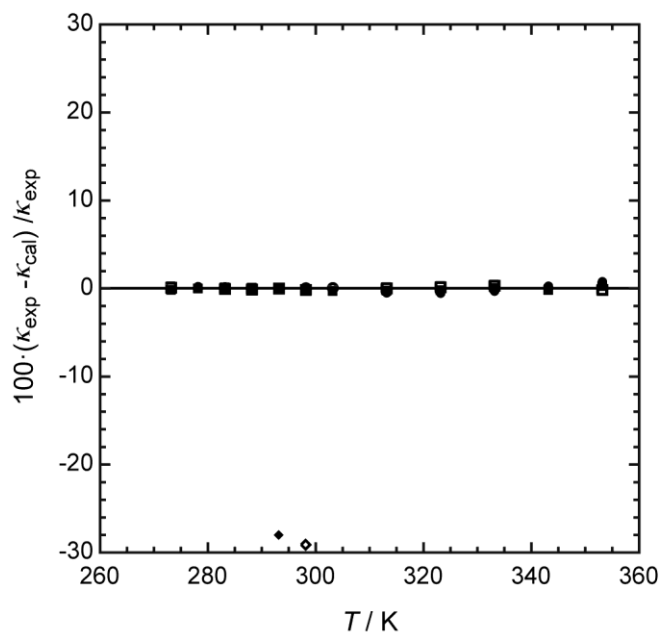

**Figure S5.** Overview of the residuals between the experimental electrical conductivity  $\kappa_{\text{exp}}$  and the calculated electrical conductivity  $\kappa_{\text{cal}}$  as a function of temperature  $T$ . Circle (open),  $[\text{Pyr}_{1,101}][\text{FSA}]$  for VFT; circle (filled),  $[\text{Pyr}_{1,101}][\text{FSA}]$  for Litovitz; square (open),  $[\text{Pyr}_{1,4}][\text{FSA}]$  for VFT; square (filled),  $[\text{Pyr}_{1,4}][\text{FSA}]$  for Litovitz; diamond (filled),  $[\text{Pyr}_{1,4}][\text{FSA}]$  (ref. 4) for VFT; diamond (open),  $[\text{Pyr}_{1,4}][\text{FSA}]$  (ref. 2) for VFT.
